# Supplementary material for: Contrast Administration Impacts CT-Based Radiomics of Colorectal Liver Metastases and Non-Tumoral Liver Parenchyma Revealing the “Radiological” Tumour Microenvironment
Source: MDPI journal article supplement (doi:10.3390/diagnostics11071162), 2021-06-25
Supplement: s1 [file s1]

### Supplementary Tables

**Table S1.** Significance of feature difference of lesions' high and volume VOIs between portal and pre-contrast phases. Matching of variation was established by comparing the  $p$  values of the two groups. Bonferroni correction for multiple comparisons was applied: a  $p$ -value  $\leq 0.001$  was considered significant.

| CLASS                                                | FEATURE                                     | $p$ HIGH VOL-<br>UME | $p$ LOW VOL-<br>UME | MATC<br>H | CLASS                                                            | FEATURE         | $p$ HIGH VOL-<br>UME | $p$ LOW VOL-<br>UME | MATC<br>H |
|------------------------------------------------------|---------------------------------------------|----------------------|---------------------|-----------|------------------------------------------------------------------|-----------------|----------------------|---------------------|-----------|
| CONVEN-<br>TIONAL<br>(INTENSITY)                     | MIN                                         | <0.001               | <0.001              | Y         | GRAY<br>LEVEL<br>RUN-<br>LENGT<br>H MA-<br>TRICES<br>(GLRLM<br>) | GLRLM_SRE       | 0.002                | <0.001              | N         |
|                                                      | MEAN                                        | <0.001               | <0.001              | Y         |                                                                  | GLRLM_LRE       | 0.002                | <0.001              | N         |
|                                                      | STD. DEVIATION                              | <0.001               | <0.001              | Y         |                                                                  | GLRLM_LGRE      | 0.011                | 0.002               | Y         |
|                                                      | MAX                                         | <0.001               | <0.001              | Y         |                                                                  | GLRLM_HGRE      | <0.001               | <0.001              | Y         |
|                                                      | Q1                                          | <0.001               | <0.001              | Y         |                                                                  | GLRLM_SRLG<br>E | 0.018                | 0.011               | Y         |
|                                                      | Q2                                          | <0.001               | <0.001              | Y         |                                                                  | GLRLM_SRHG<br>E | <0.001               | <0.001              | Y         |
|                                                      | Q3                                          | <0.001               | <0.001              | Y         |                                                                  | GLRLM_LRLG<br>E | <0.001               | <0.001              | Y         |
| FIRST ORDER                                          | HISTO_Skewness                              | <0.001               | <0.001              | Y         | GRAY<br>LEVEL<br>ZONE<br>LENGT<br>H MA-<br>TRICES<br>(GLZLM<br>) | GLRLM_LRHG<br>E | 0.128                | 0.435               | Y         |
|                                                      | HISTO_Kurtosis                              | 0.006                | 0.180               | Y         |                                                                  | GLRLM_GLNU      | 0.159                | 0.014               | Y         |
|                                                      | HISTO_Entropy_log10                         | <0.001               | <0.001              | Y         |                                                                  | GLRLM_RLNU      | 0.717                | 0.554               | Y         |
|                                                      | HISTO_Entropy_log2                          | <0.001               | <0.001              | Y         |                                                                  | GLRLM_RP        | 0.001                | <0.001              | Y         |
|                                                      | HISTO_Energy (=Uniformity)                  | <0.001               | <0.001              | Y         |                                                                  | GLZLM_SZE       | <0.001               | 0.007               | N         |
| GRAY LEVEL<br>COLOCALIZA-<br>TION MATRICES<br>(GLCM) | GLCM_Homogeneity (=inverse differ-<br>ence) | <0.001               | <0.001              | Y         | GRAY<br>LEVEL<br>ZONE<br>LENGT<br>H MA-<br>TRICES<br>(GLZLM<br>) | GLZLM_LZE       | 0.011                | <0.001              | N         |
|                                                      | GLCM_Energy (=Angular second mo-<br>ment)   | <0.001               | <0.001              | Y         |                                                                  | GLZLM_LGZE      | <0.001               | <0.001              | Y         |
|                                                      | GLCM_Contrast (=Variance)                   | 0.003                | <0.001              | N         |                                                                  | GLZLM_HGZE      | <0.001               | <0.001              | Y         |
|                                                      | GLCM_Correlation                            | <0.001               | <0.001              | Y         |                                                                  | GLZLM_SZLG<br>E | <0.001               | <0.001              | Y         |
|                                                      | GLCM_Entropy_log10                          | <0.001               | <0.001              | Y         |                                                                  | GLZLM_SZHG<br>E | <0.001               | <0.001              | Y         |
|                                                      | GLCM_Entropy_log2(=Joint entropy)           | <0.001               | <0.001              | Y         |                                                                  | GLZLM_LZLG<br>E | 0.041                | <0.001              | N         |

|       |                    |        |        |   |                 |       |        |   |
|-------|--------------------|--------|--------|---|-----------------|-------|--------|---|
| NGLDM | GLCM_Dissimilarity | 0.001  | <0.001 | Y | GLZLM_LZHG<br>E | 0.026 | <0.001 | N |
|       | NGLDM_Coarseness   | 0.395  | 0.100  | Y | GLZLM_GLNU      | 0.331 | 0.224  | Y |
|       | NGLDM_Contrast     | <0.001 | <0.001 | Y | GLZLM_ZLNU      | 0.662 | 0.506  | Y |
|       | NGLDM_Busyness     | 0.387  | 0.008  | Y | GLZLM_ZP        | 0.051 | <0.001 | N |

**Table S2.** Entropy and uniformity-related features values in the tumour, Margin, and Liver VOI.

| VARIABLE                                  | HISTO_En-<br>tropy_log2 | GLCM_En-<br>tropy_log2 | HISTO_En-GLCM_Homoge-<br>ergy (= uni-<br>formity) | neity (=Inverse<br>difference) | GLCM_Energy<br>(=Angular second<br>moment) | GLZLM_SZ<br>HGE |
|-------------------------------------------|-------------------------|------------------------|---------------------------------------------------|--------------------------------|--------------------------------------------|-----------------|
| PORTAL VENOUS PHASE                       |                         |                        |                                                   |                                |                                            |                 |
| TUMOR (MEAN<br>± SD)                      | 3.08 ± 0.34             | 5.76 ± 0.64            | 0.14 ± 0.03                                       | 0.49 ± 0.05                    | 0.028 ± 0.014                              | 6687 ± 642      |
| MARGIN (MEAN<br>± SD)                     | 2.95 ± 0.35             | 5.63 ± 0.61            | 0.16 ± 0.04                                       | 0.51± 0.05                     | 0.033 ± 0.015                              | 7210 ± 477      |
| LIVER (MEAN ±<br>SD)                      | 2.57 ± 0.28             | 5.08 ± 0.55            | 0.2 ±0.04                                         | 0.53 ± 0.05                    | 0.044 ± 0.018                              | 7309± 591       |
| TUMOR VS<br>MARGIN ( <i>p</i> -<br>VALUE) | <0.001                  | 0.002                  | <0.001                                            | <0.001                         | <0.001                                     | <0.001          |
| TUMOR VS<br>LIVER ( <i>p</i> -<br>VALUE)  | <0.001                  | <0.001                 | <0.001                                            | <0.001                         | <0.001                                     | <0.001          |
| MARGIN VS<br>LIVER ( <i>p</i> -<br>VALUE) | <0.001                  | <0.001                 | <0.001                                            | <0.001                         | <0.001                                     | 0.040           |
| PRE-CONTRAST PHASE                        |                         |                        |                                                   |                                |                                            |                 |
| TUMOR (MEAN<br>± SD)                      | 2.83 ± 0.47             | 5.37 ± 0.77            | 0.18 ± 0.04                                       | 0.51 ± 0.06                    | 0.038 ± 0.017                              | 6519 ± 680      |
| MARGIN (MEAN<br>± SD)                     | 2.83 ± 0.41             | 5.42 ± 0.68            | 0.18 ± 0.04                                       | 0.052 ± 0.05                   | 0.037 ± 0.016                              | 6577 ± 547      |
| LIVER (MEAN ±<br>SD)                      | 2.53 ± 0.35             | 4.97 ± 0.68            | 0.21 ± 0.05                                       | 0.53 ± 0.06                    | 0.048 ± 0.021                              | 6757 ± 471      |

|                                                  |        |        |        |        |        |        |
|--------------------------------------------------|--------|--------|--------|--------|--------|--------|
| <b>TUMOR VS<br/>MARGIN (<i>p</i>-<br/>VALUE)</b> | 0.979  | 0.375  | 0.432  | 0.077  | 0.810  | 0.185  |
| <b>TUMOR VS<br/>LIVER (<i>p</i>-<br/>VALUE)</b>  | <0.001 | <0.001 | <0.001 | <0.001 | <0.001 | <0.001 |
| <b>MARGIN VS<br/>LIVER (<i>p</i>-<br/>VALUE)</b> | <0.001 | <0.001 | <0.001 | 0.007  | <0.001 | <0.001 |

**Table S3.** Differences in second-order features values across the Tumour, Margin, and Liver VOI in the portal and the pre-contrast phases.

| PHASE           | PORTAL PHASE ( <i>p</i> values)        |                                      |                           |                  | PRE-CONTRAST PHASE ( <i>p</i> values)  |                                      |                           |                  |
|-----------------|----------------------------------------|--------------------------------------|---------------------------|------------------|----------------------------------------|--------------------------------------|---------------------------|------------------|
| VARIABLE        | GLCM_Homogeneity (=Inverse difference) | GLCM_Energy (=Angular second moment) | GLCM_Contrast (=Variance) | GLCM_Correlation | GLCM_Homogeneity (=Inverse difference) | GLCM_Energy (=Angular second moment) | GLCM_Contrast (=Variance) | GLCM_Correlation |
| TUMOR VS MARGIN | <0.001                                 | <0.001                               | 0.013                     | 6.50E-01         | <0.001                                 | <0.001                               | 0.665                     | <0.001           |
| TUMOR VS LIVER  | <0.001                                 | <0.001                               | <0.001                    | <0.001           | <0.001                                 | <0.001                               | <0.001                    | <0.001           |
| MARGIN VS LIVER | <0.001                                 | <0.001                               | <0.001                    | <0.001           | <0.001                                 | <0.001                               | <0.001                    | <0.001           |
| VARIABLE        | GLCM_Entropy_log10                     | GLCM_Entropy_log2 (=Joint entropy)   | GLCM_Dissimilarity        | GLRLM_SRE        | GLCM_Entropy_log10                     | GLCM_Entropy_log2 (=Joint entropy)   | GLCM_Dissimilarity        | GLRLM_SRE        |
| TUMOR VS MARGIN | 0.02                                   | 0.02                                 | <0.001                    | <0.001           | 0.375                                  | 0.375                                | 0.292                     | 0.021            |
| TUMOR VS LIVER  | <0.001                                 | <0.001                               | <0.001                    | <0.001           | <0.001                                 | <0.001                               | <0.001                    | <0.001           |
| MARGIN VS LIVER | <0.001                                 | <0.001                               | <0.001                    | <0.001           | <0.001                                 | <0.001                               | 0.009                     | <0.001           |
| VARIABLE        | GLRLM_LRE                              | GLRLM_LGRE                           | GLRLM_HGRE                | GLRLM_SRLGE      | GLRLM_LRE                              | GLRLM_LGRE                           | GLRLM_HGRE                | GLRLM_SRLGE      |
| TUMOR VS MARGIN | <0.001                                 | <0.001                               | <0.001                    | <0.001           | 0.021                                  | <0.001                               | <0.001                    | <0.001           |
| TUMOR VS LIVER  | <0.001                                 | <0.001                               | <0.001                    | <0.001           | <0.001                                 | <0.001                               | <0.001                    | 0.042            |
| MARGIN VS LIVER | <0.001                                 | 0.03                                 | 0.082                     | <0.001           | <0.001                                 | <0.001                               | <0.001                    | <0.001           |
| VARIABLE        | GLRLM_SRHGE                            | GLRLM_LRLGE                          | GLRLM_LRHGE               | GLRLM_GLNU       | GLRLM_SRHGE                            | GLRLM_LRLGE                          | GLRLM_LRHGE               | GLRLM_GLNU       |
| TUMOR VS MARGIN | <0.001                                 | 0.545                                | <0.001                    | <0.001           | 0.0320                                 | 0.379                                | 0.0039                    | 0.0021           |
| TUMOR VS LIVER  | <0.001                                 | 0.001                                | <0.001                    | <0.001           | 0.6050                                 | <0.001                               | <0.001                    | <0.001           |
| MARGIN VS LIVER | <0.001                                 | <0.001                               | <0.001                    | <0.001           | 0.5810                                 | 0.002                                | <0.001                    | <0.001           |
| VARIABLE        | GLRLM_RLNU                             | GLRLM_RP                             | NGLDM_Coarseness          | NGLDM_Contrast   | GLRLM_RLNU                             | GLRLM_RP                             | NGLDM_Coarseness          | NGLDM_Contrast   |
| TUMOR VS MARGIN | 0.0020                                 | <0.001                               | <0.001                    | <0.001           | <0.001                                 | 0.017                                | <0.001                    | <0.001           |
| TUMOR VS LIVER  | <0.001                                 | <0.001                               | 0.002                     | <0.001           | <0.001                                 | <0.001                               | <0.001                    | 0.226            |
| MARGIN VS LIVER | <0.001                                 | <0.001                               | <0.001                    | <0.001           | <0.001                                 | <0.001                               | <0.001                    | <0.001           |
| VARIABLE        | NGLDM_Busyness                         | GLZLM_SIZE                           | GLZLM_LZE                 | GLZLM_LGZE       | NGLDM_Busyness                         | GLZLM_SIZE                           | GLZLM_LZE                 | GLZLM_LGZE       |
| TUMOR VS MARGIN | <0.001                                 | <0.001                               | <0.001                    | <0.001           | <0.001                                 | 0.058                                | <0.001                    | 0.002            |
| TUMOR VS LIVER  | <0.001                                 | 0.146                                | 0.006                     | <0.001           | <0.001                                 | 0.635                                | <0.001                    | <0.001           |
| MARGIN VS LIVER | <0.001                                 | 0.143                                | <0.001                    | <0.001           | <0.001                                 | 0.245                                | <0.001                    | 0.04             |
| VARIABLE        | GLZLM_HGZE                             | GLZLM_SZLGE                          | GLZLM_SZHGE               | GLZLM_LZLGE      | GLZLM_HGZE                             | GLZLM_SZLGE                          | GLZLM_SZHGE               | GLZLM_LZLGE      |

[illegible]
